# Supplementary material
Source: publisher site journal article supplement (https://www.dovepress.com/article/398731)
Supplement: Supplementary file 1 [file get_supplementary_file.php]

**Supplementary file 1**. Other baseline characteristics in survivors vs. non-survivors

| **Characteristics** | **Total**  **(n=215)** | **Non-survivors**  **(n = 63)** | **Survivors**  **(n = 152)** | **p-value** |
| --- | --- | --- | --- | --- |
| **Comorbidities** |  |  |  |  |
| Hypertension | 110 (51.2) | 36 (57.1) | 74 (48.7) | 0.259 |
| Diabetes mellitus | 66 (30.7) | 25 (39.7) | 41 (27) | 0.066 |
| CKD | 29 (13.5) | 14 (22.2) | 15 (9.9) | 0.016 |
| Chronic lung disease | 20 (9.3) | 7 (11.1) | 13 (8.6) | .608 |
| Stroke | 14 (6.5) | 4 (6.3) | 10 (6.6) | 0.941 |
| CAD | 12 (5.6) | 3 (4.8) | 9 (5.9) | 0.736 |
| Malignancy | 5 (2.3) | 5 (7.9) | 0 | <0.001 |
| Cirrhosis | 4 (1.9) | 3 (4.8) | 1 (0.7) | 0.077 |
| **Religion** |  |  |  |  |
| Buddhist | 137 (63.7) | 41 (65.1) | 96 (63.2) | 0.877 |
| Islam | 78 (36.3) | 22 (34.9) | 56 (36.8) | 0.877 |
| **No. of vaccination** |  |  |  | 0.068 |
| 1 | 36 (16.7) | 7 (11.1) | 29 (19.1) |  |
| 2 | 15 (6.9) | 3 (4.8) | 12 (7.9) |  |
| **Initial vital signs** |  |  |  |  |
| BT, °C | 37.1 (36.6–38) | 37.2 (36.7–38.2) | 37 (36.5–37.8) | 0.397 |
| HR, bpm | 90 (78–108) | 97 (79–120) | 88.5 (77–104.8) | 0.051 |
| RR, per min | 24 (20–30) | 26 (22–30) | 24 (20–30) | 0.108 |
| SBP, mm Hg | 135 (120–150) | 135 (118–153) | 136 (121–149) | 0.964 |
| DBP, mm Hg | 80 (68–89) | 73 (65–87) | 81 (71–90) | 0.025 |
| SpO2, % | 96 (91–99) | 96 (90–100) | 96 (91–99) | 0.873 |
| **GCS** | 11 (9–15) | 10 (3–11) | 15 (10–15) | < 0.001 |
| **Treatment** |  |  |  |  |
| Favipiravir | 113 (52.6) | 28 (44.4) | 85 (55.9) | 0.125 |
| Remdesivir | 183 (85.1) | 55 (87.3) | 128 (84.2) | 0.562 |
| Steroid | 209 (97.2) | 61 (96.8) | 148 (97.4) | 0.826 |
| Convalescent plasma | 16 (7.4) | 4 (6.3) | 12 (7.9) | 0.694 |
| IL-6 inhibitor | 30 (14) | 13 (20.6) | 17 (11.2) | 0.069 |
| Janus kinase inhibitor | 19 (8.8) | 2 (3.2) | 17 (11.2) | 0.067 |
| Vasopressor | 86 (40) | 50 (79.4) | 36 (23.7) | <0.001 |
| RRT | 10 (4.7) | 6 (9.5) | 4 (2.6) | 0.067 |
| Hemoperfusion | 10 (4.7) | 5 (7.9) | 5 (3.3) | 0.162 |
| ECMO | 5 (2.3) | 2 (3.2) | 3 (2) | 0.631 |
| **Initial respiratory support** |  |  |  |  |
| O2 cannula | 22 (10.2) | 4 (6.3) | 18 (11.8) | 0.323 |
| HFNC | 101 (47) | 12 (19) | 89 (58.6) | <0.001 |
| NIV | 2 (0.9) | 0 | 2 (1.3) | 1.000 |
| MV | 90 (41.9) | 47 (74.6) | 43 (28.3) | <0.001 |
| **Duration of MV, days** | 11 (4–20) | 13 (7.5–21) | 8 (4–20) | 0.16 |
| **PaO2/FiO2 ratio** | 110 (77.5–145) | 91.2 (69.2–120.7) | 123.3 (84.1–171.7) | 0.001 |
| **Inflammatory markers** |  |  |  |  |
| CRP, mg | 55.6 (22.3–112) | 71.4 (32.9–150.4) | 50.4 (20–100.4) | 0.040 |
| Ferritin, mcg/L | 1021 (450–1883) | 1367 (823–2000) | 875 (336–1570.5) | 0.003 |
| IL-6, pg/mL | 48.5 (16.5–108) | 120 (50.6–349) | 33.9 (12.6–65.2) | <0.001 |
| **Nosocomial infection** |  |  |  |  |
| VAP/HAP | 64 (29.8) | 37 (58.7) | 27 (17.8) | <0.001 |
| BSI | 21 (9.8) | 11 (17.5) | 10 (6.6) | 0.022 |
| CRBSI | 6 (2.8) | 4 (6.3) | 2 (1.3) | 0.062 |
| UTI | 45 (20.9) | 14 (22.2) | 31 (20.4) | 0.854 |
| **Duration of ward stay** | 15 (11–27) | 14 (9–24) | 15 (11–30) | 0.096 |

Note**:** Data are presented as median (interquartile range) or n (%)

**Abbreviations:** ARDS, acute respiratory distress syndrome; BMI, body mass index; BSI, blood stream infection; BT, body temperature; CAD, coronary artery disease; CKD, chronic kidney disease; CRP, C-reactive protein; CURB-65, confusion, urea nitrogen, respiratory rate, blood pressure, 65 years of age and older; DBP, diastolic blood pressure; GCS, Glasgow Coma Scale; HR, heart rate; ECMO, extracorporeal membrane oxygenation; HAP, hospital-acquired pneumonia; HFNC, high-flow nasal cannula; CRBSI, catheter-related bloodstream infection; IL-6, interleukin 6; NEWS. NIV: non-invasive ventilation; MV: mechanical ventilation; PaO2/FiO2: arterial oxygen pressure to fractional inspired oxygen concentration; RR: respiratory rate; RRT: renal replacement therapy; SBP: systolic blood pressure; SOFA: sequential organ failure assessment; SpO2: peripheral capillary oxygen saturation; UTI: urinary tract infection; VAP: ventilator-associated pneumonia
